# Supplementary material for: Type I and III IFNs produced by the nasal epithelia and dimmed inflammation are features of alpacas resolving MERS-CoV infection
Source: PubMed Central journal article supplement (PMC8195365; doi:10.1371/journal.ppat.1009229), 2021-05-24

**A**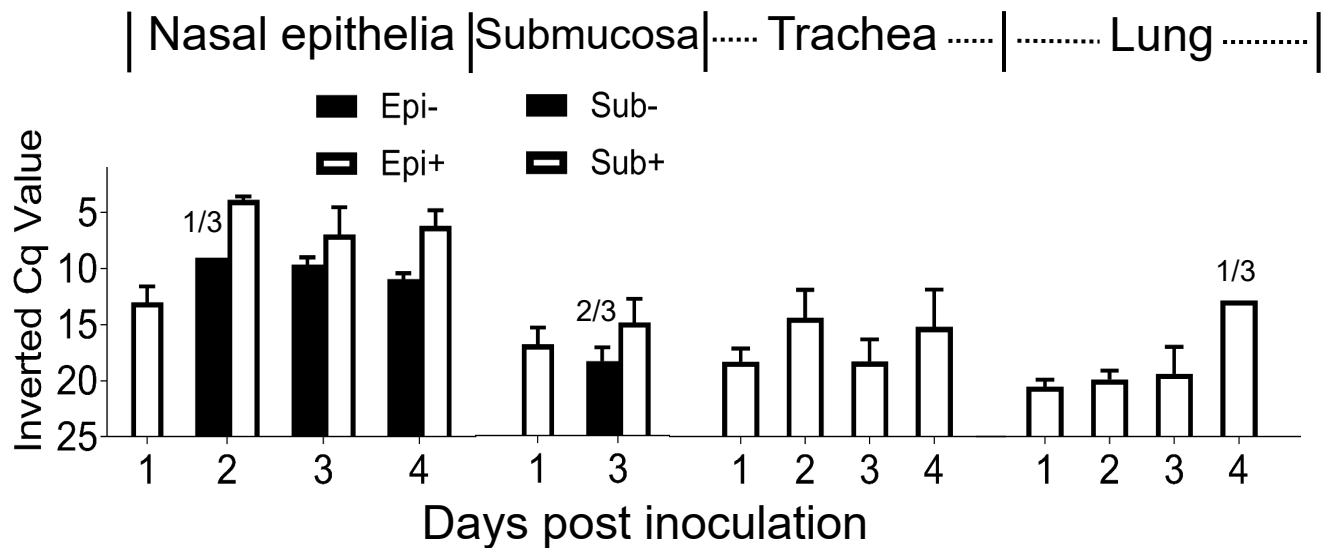**B**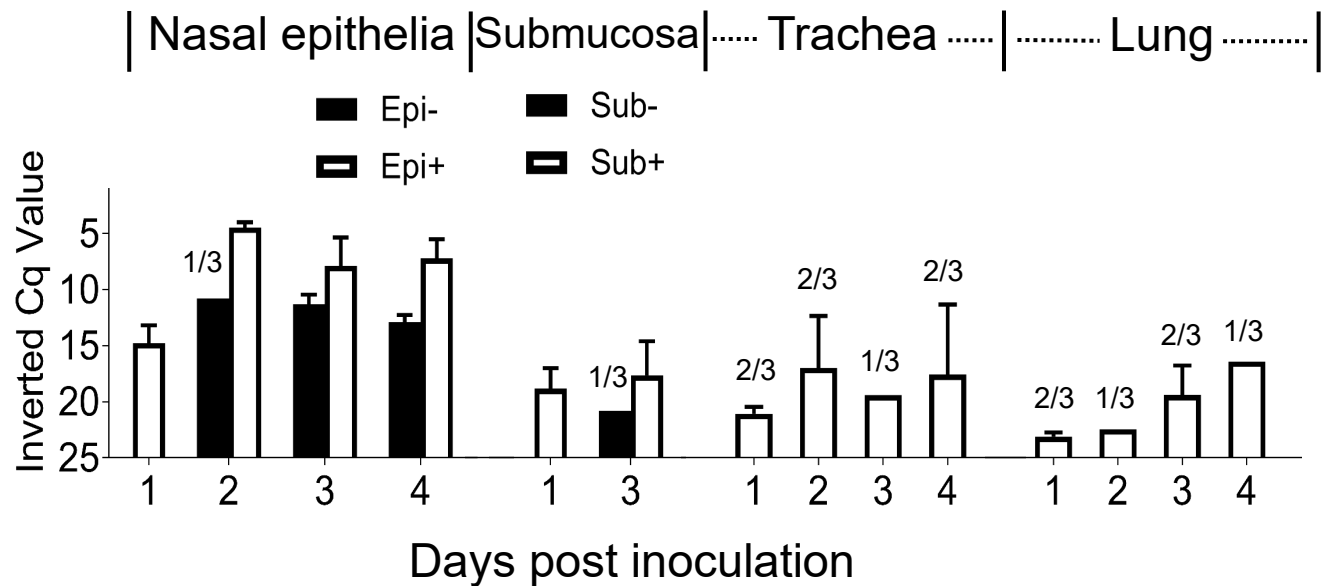

Supplement: ppat.1009229.s004.pdf [file ppat.1009229.s004.pdf]
